# Supplementary material for: Self-assembly of nanoparticles from cyclotriphosphazenes grafted with hexa-[p-(carbonyl tryptophan ethyl ester) phenoxy)] group
Source: Royal Society of Chemistry journal article supplement (doi:10.1039/c2ra20515g), 2012-01-01
Supplement: c2ra20515g.pdf [file c2ra20515g.pdf]

## Supporting Information:

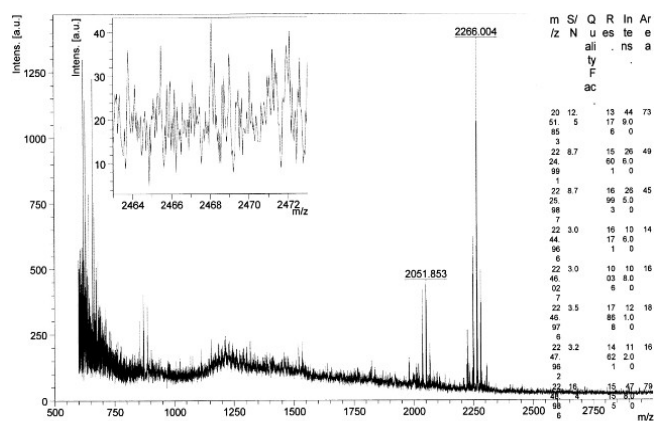

Fig. S1 The Mass Spectrum of HEPCP.

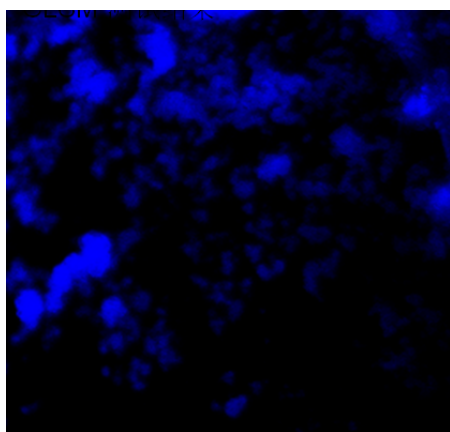

Fig. S2 A CLSM image of the nanoparticles formed from HEPCP.
